# Supplementary material for: Preparation and characterization of nanofunctionalized alginate/methacrylated gelatin hybrid hydrogels
Source: Royal Society of Chemistry journal article supplement (doi:10.1039/c6ra03699f), 2016-01-01
Supplement: c6ra03699f1.pdf [file c6ra03699f1.pdf]

# 1                    **Electronic Supplementary Information**

## 2 3                    **Preparation and characterization of nanofunctionalized** 4                    **alginate/methacrylated gelatin hybrid hydrogels**

5     *R. Kadri, <sup>a§</sup> G. Ben Messaoud, <sup>a§</sup> A. Tamayol,<sup>b,c</sup> B. Aliakbarian,<sup>d,e</sup> H.Y. Zhang,<sup>f</sup>*

6                    *M. Hasan,<sup>a</sup> L. Sánchez-González <sup>a</sup> and E. Arab-Tehrany <sup>\*a</sup>*

7  
8     <sup>a</sup> Laboratoire d'ingénierie des biomolécules (LIBio). ENSAIA-Université de Lorraine. 2  
9     avenue de la forêt de Haye, TSA 40602, 54518Vandoeuvre-lès-Nancy Cedex, France. Email  
10    address: [elmira.arab-tehrany@univ-lorraine.fr](mailto:elmira.arab-tehrany@univ-lorraine.fr), Tel: +33 3 83 58 5 77, Fax: +33 3 83 58 57 72.

11    <sup>b</sup> Biomaterials Innovation Research Center, Division of Biomedical Engineering, Department  
12    of Medicine, Brigham and Women's Hospital, Harvard Medical School, Boston 02139, MA,  
13    USA.

14    <sup>c</sup> Harvard-Massachusetts Institute of Technology Division of Health Sciences and  
15    Technology, Massachusetts Institute of Technology, Cambridge 02139,MA, USA.

16    <sup>d</sup> Department of Civil, Chemical and Environmental Engineering (DICCA), University of  
17    Genoa, Genoa, Italy.

18    <sup>e</sup> Research Center for Biologically Inspired Engineering in Vascular Medicine and Longevity  
19    (BELONG), Genoa, Italy.

20    <sup>f</sup> Université de Lorraine, Institut Jean Lamour UMR 7198 CNRS, Ecole des Mines, Parc de  
21    Saurupt, CS 14234, 54042 Nancy, France.

22    § R. Kadri and G. Ben Messaoud contributed equally to this work.

23  
24

25

26

27    **1. Experimental**

## 28 **1.1. Material**

29 Alginic acid sodium salt (SA) from brown algae (M/G  $\approx$  1.56) was purchased from Sigma  
30 Aldrich. The average viscosity molecular weight of the polymer in pure water  $M_v$  was  $1.69$   
31  $10^5$  g.mol<sup>-1</sup> was calculated at 20°C in 0.1 M NaCl using the Mark–Houwink–Sakurada  
32 correlation:  $[\eta] = KM_v^\alpha$  Where  $\alpha = 0.92$  and  $k = 7.3 \cdot 10^{-5}$ .<sup>1</sup>  
33 Calcium chloride dihydrate was obtained from VWR (International, Leuven, Belgium).  
34 Gelatin (type A, 300 bloom from porcine skin), methacrylic anhydride (MA), photoinitiator  
35 (PI) 2-Hydroxy-4'-(2-hydroxyethoxy)-2-methylpropiophenone and phosphate buffered saline  
36 tablets (PBS) were purchased from Sigma-Aldrich (Chemie, Steinheim, Germany). Rapeseed  
37 lecithin were acquired from Solae Europe SA society (Geneva-Switzerland).

38

## 39 **1.2. Nanoliposomes preparation**

40 Rapeseed lecithin were dissolved in distilled water with a concentration of 5% (w/v). The  
41 suspension was mixed for 4 h under agitation at inert atmosphere (nitrogen) and then  
42 sonicated at 40 kHz and 40% of full power for 300 s (1 s on / 1 s off) to get a homogeneous  
43 solution. Finally, the liposomal suspension was stored in the dark at 4°C until use. In order to  
44 functionalize the studied systems, 43  $\mu$ l of nanoliposomes were added to each 5mL of the  
45 polymer solutions. The size distribution (Mean diameter and Polydispersity Index) and  
46 electrophoretic mobility ( $\mu$ E) of the liposome dispersions were measured by dynamic light  
47 scattering (DLS) using a Malvern Zetasizer Nano ZS (Malvern Instruments Ltd, UK). Prior to  
48 measuring size, the samples were diluted (1:400) into a distilled water. Measurements were  
49 made at 37 °C with a fixed angle of 173°. Three readings were made per sample and each  
50 measurement was repeated three times.

51 The average particle size of nanoliposomes was 110 nm with an electrophoretic mobility of -  
52 3.41mV (Fig. S1).

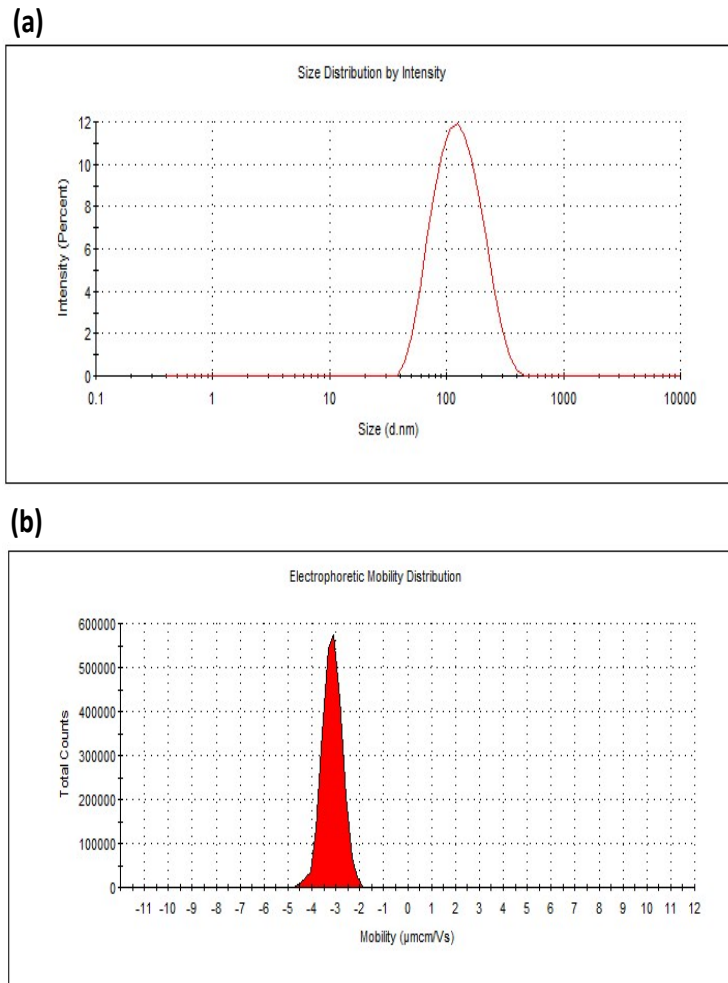

53

54 **Fig.S1.** Size distribution by intensity of the prepared nanoliposomes (a) and electrophoretic  
 55 mobility distribution (b).

56

### 57 1.3. Synthesis of GelMA

58 Gelatin was dispersed at 10% (w/v) in PBS and stirred at 60 °C until fully dissolved. Then, 8  
 59 mL of MA was added very slowly and dropwisly under stirring. After 3h, the reaction was  
 60 stopped following a dilution 5X using warm phosphate buffered saline. Diluted GelMA was  
 61 then dialyzed at 40-50 °C for one week against distilled water using a dialysis membrane  
 62 (Spectro/Por molecular porous membrane tubing, MWCO 12-14,000, SpectrumLabs, Inc.,  
 63 Rancho Dominguez, CA, USA). The solution was then lyophilized during 1 week. GelMA  
 64 was developed with high methacrylation degree (~70%).<sup>2</sup>

65

#### 66 **1.4. Solutions preparation**

67 To prepare alginate solution, 6 g of alginic acid sodium salt was dispersed into stirred 100 mL  
68 double distilled water. After complete solubilization, the alginate solution was degassed to  
69 remove air bubbles before its use.

70 GelMA solution (30 %, m/v) was prepared by dissolving the freeze-dried powder into a PBS  
71 solution at 40 °C. Then, 1% of PI was added and the temperature was increased to 80 °C to  
72 allow its solubilization.

73 The alginate/GelMA solution was prepared at 40 °C by mixing alginate with GelMA, the final  
74 concentrations is 2 % and 20% (m/v), respectively. Then 1 % (m/v) of PI was added to the  
75 final mixture.

76

#### 77 **1.5. Hydrogels preparation**

##### 78 **1.5.1. Alginate hydrogel**

79 Alginate hydrogel was synthesized by pouring 2mL of the solution slowly on 5 mL of calcium  
80 chloride solution (2% m/v) in petri dishes. The obtained hydrogel was incubated into the  
81 CaCl<sub>2</sub> for 24 h at 4°C in order to complete the reticulation process and then washed with  
82 distilled water before use.

83

##### 84 **1.5.2. GelMA Hydrogel**

85 GelMA was crosslinked after poured on a specific mold with the controlled dimensions and  
86 then exposed to UV light (360-480 nm) for 240 s. The PI absorbs the UV light and transform  
87 the solution onto gel. The obtained hydrogel was then washed with distilled water before use.

##### 88 **1.5.3. Alginate/GelMA IPN hydrogel**

89 The crosslinking process occurs in two stages. First, 2 mL of the mixture was poured on 5 mL  
90 of CaCl<sub>2</sub> solution (2%, m/v) in order to allow alginate cross-linking then the obtained semi-  
91 IPN was exposed to UV light for 240 s to allow the free radicals photopolymerization of the  
92 GelMA. The final hydrogel was then rinsed with PBS to remove the excess of CaCl<sub>2</sub>.

93

## 94 **1.6. Characterization of the solutions**

### 95 **1.6.1. Zeta potential measurements**

96 Zeta potential of the various solutions were measured with Zetasizer Nano ZS (Malvern  
97 Instruments Ltd., UK) using dynamic light scattering (DLS). The determined potential is an  
98 important parameter to analyze the effect of the nanoparticles in suspension. The samples  
99 were diluted (1:2) and introduced into disposable capillary cells equipped with gold electrodes  
100 designed to afford maximum zeta potential measurement capability. All measurements were  
101 carried out at 37 °C with a fixed angle of 173°. The presented values are the mean of three  
102 measurements.

### 103 **1.6.2. Surface tension**

104 The surface tension of aqueous solutions of alginate, GelMA and the mixture of the two  
105 polymers, with and without liposomes was measured using a tensiometer Wilhelmy plate type  
106 (krüss GmbH, Hamburg, Germany) at a constant temperature of 37 °C. The platinum plate  
107 was cleaned with a flame treatment in order to remove any contaminating substances. The  
108 plate was then inserted into the solution placed in a circular glass vessel with an immersion  
109 depth of 2.0 mm. The surface tension was measured with a crosshead speed of 10 mm / min  
110 and a probe sensitivity of 0.005g and a duration of 60 seconds. The presented values of the  
111 surface tension are the mean of three measurements.

112

## 113 **1.7. Characterization of the prepared hydrogels**

### 114 1.7.1. Contact angle

115 The wettability of all samples is evaluated by the measurement of the contact angle formed on  
116 the surface of the hydrogel using the sessil drop method. Before starting the test, the gel is  
117 taken out of distilled water and dried superficially in an oven at body temperature of 37 °C.  
118 After reaching the target temperature, uniform distilled water drops of 0.75 µl were deposited  
119 on the gels using a microsyringe. The liquid on the surface of the hydrogel form a static angle  
120 measured with a goniometer (Digidrop, GBX instruments, France) equipped with an image  
121 analysis software (Windrop, France). All data presented the mean values of three replicates  
122 performed on the surface of each hydrogel.

123

### 124 1.7.2. Surface energy measurement

125 The surface energy of the hydrogels is calculated using the Owens-Wendt theory based on the  
126 contact angle measurements. It includes two constituents, the dispersion  $\gamma^d$  and the polar  $\gamma^p$ ,  
127 composing the total of surface energy.<sup>3,4</sup>

$$128 \gamma^T = \gamma^d + \gamma^p$$

129 (1)

130 Owens and Wendt introduce the contact angle  $\theta$  toward the equation and gives the following  
131 relation (eq.2):

$$132 \gamma_L (1 + \cos\theta) = 2\sqrt{\gamma_S^d \gamma_L^d} + \sqrt{\gamma_S^p \gamma_L^p}$$

133 (2)

134 where  $\gamma_L$  is the liquid surface tension,  $\gamma_S^d$  and  $\gamma_S^p$  form respectively the dispersive and the polar  
135 components of the hydrogel,  $\gamma_L^d$  is the dispersive component of the liquid and  $\gamma_L^p$  is the polar  
136 component of the liquid. The total surface energy of each hydrogel is determined before and  
137 after the nanofunctionalization of hydrogels.

### 138 **1.7.3. Hydrogels swelling analysis**

139 To study swelling properties, hydrogels were frozen and lyophilized in order to obtain the  
140 hydrogels dry mass. The lyophilized hydrogels were then incubated in pure water for 24 and  
141 48 hours at 37°C and their weights was measured at each time to determine the wet mass. The  
142 swelling ratio was calculated as the ratio of wet mass to dry mass. Measurements were  
143 repeated three times.

144

### 145 **1.7.4. Conductivity**

146 The conductivity measurements were performed using a conductimeter (HD 2156.1, Delta  
147 OHM). The hydrogel was removed from the distilled water and then dried. The sample was  
148 then placed on a contact probe and the conductivity was displayed on a LCD display.

149

### 150 **1.7.5. Scanning Electron Microscopy**

151 The surface morphology of the different hydrogels were characterized by Quanta 200 high  
152 resolution scanning electron microscope low vacuum mode (FEI-Japon). The use of "low  
153 vacuum" mode presents powerful tools for the observation of the surface topography of  
154 biological materials without sputter-coated. It also preserve the delicate samples from the  
155 electron beam damaging. The maximal resolution attained, employing an electron beam spot  
156 size of 7, could be lower than 5 nanometers. A large field detector (LFD) was used in order to  
157 execute this analysis. The squared shaped samples with dimensions 9mm x 9mm were  
158 inserted and maintained in a holder inside the SEM chamber and the tests were performed at  
159 laboratory temperature of 25°C with a relative humidity of 50%. A partial vacuum was  
160 created within the chamber and the air was evacuated using a pump which provide a regular  
161 pression of 60 mbar.

162 The images were taken from a distance of 10 mm at an accelerating voltage of 15 kV. The  
163 pictures were provided utilizing logical “xT microscope server”.

#### 164 **1.7.7. Drug release**

165 To evaluate the potential use of the synthesized matrixes for drug delivery applications, the  
166 prepared hydrogels were incubated in 10 ml of water at 37 °C. At scheduled time intervals, 1  
167 mL of the external media was pipetted after gentle stirring and the volume was replaced by 1  
168 mL of fresh water to keep a constant volume. The released amount of curcumin was  
169 determined using the method developed by Hasan et al., 2014.<sup>5</sup>

170 Briefly, the concentration of the released curcumin was measured by a reverse-phase HPLC  
171 system (Shimadzu, Kyoto, Japan) equipped with a quaternary pump (LC-20AD), an auto-  
172 injector (SIL-20AC HT), a UV–vis photodiode array detector (UV–vis PDA, SPD-M20A), a  
173 Zorbex SB-C18 column (5 µm, 4.6 mm × 250 mm) and Labsolution data software.  
174 Suspension was analyzed in isocratic mode using methanol (v/v, 5%), acetic acid 2% (v/v,  
175 30%) and acetonitrile (v/v, 65%) at a flow rate of 0.5 mL min<sup>-1</sup>. The amount of aliquot  
176 injected onto an Alltima™ [HP C18, 5 µm (250 mm × 4.6 mm i.d.) column (GRACE,  
177 Deerfield, IL, USA)] at 25°C is 20 µL. Detection of curcumin was performed at 425 nm after  
178 8 min and 49 s.

179

#### 180 **1.7.7. Viscoelastic measurements**

181 Dynamic viscoelastic measurements were carried out using a kinexus pro rheometer (Malvern  
182 Instruments, Orsay, France) equipped with a plate-and-plate geometry (20 mm).

183 A dynamic frequency sweep test from 0.001 to 100 Hz was performed to determine the  
184 dynamic storage (G') and viscous (G'') modulus, at a strain rate confirmed to be in the linear  
185 viscoelastic range for each type of hydrogel by a prior strain amplitude sweep. During the  
186 rheological experiments, the temperature was maintained at 37 °C and the measuring system



187 was covered with a humidity chamber to minimize water evaporation. Three different  
188 hydrogel disks were tested for each type of hydrogel with the same experimental settings;  
189 average values are presented.

### 190 **1.8. Statistical analysis**

191 Results were analyzed by analysis of variance (ANOVA) with 95 % significance level using  
192 SigmaPlot software (SigmaPlot Version 11.0, Systat Software Inc., San Jose, CA, USA).

### 193 **References**

- 194 1 B. Thu, P. Bruheim, T. Espevik, O. Smidsrød, P. Soon-Shiong and G. Skjåk-Braek, *Biomaterials*, 1996, **17**, 1031–1040.
- 196 2 M. Nikkhah, N. Eshak, P. Zorlutuna, N. Annabi, M. Castello, K. Kim, A. Dolatshahi-Pirouz,  
197 F. Edalat, H. Bae, Y. Yang and others, *Biomaterials*, 2012, **33**, 9009–9018.
- 198 3 H. Y. Zhang, F. Cleymand, C. Noël, C. J. F. Kahn, M. Linder, A. Dahoun, G. Henrion and  
199 E. Arab-Tehrany, *Carbohydr. Polym.*, 2013, **93**, 401–411.
- 200 4 J. Rotta, R. Á. Ozório, A. M. Kehrwald, G. M. de Oliveira Barra, R. D. de Melo Castanho  
201 Amboni and P. L. M. Barreto, *Mater. Sci. Eng. C*, 2009, **29**, 619–623.
- 202 5 M. Hasan, N. Belhaj, H. Benachour, M. Barberi-Heyob, C. J. F. Kahn, E. Jabbari, M. Linder  
203 and E. Arab-Tehrany, *Int. J. Pharm.*, 2014, **461**, 519–528.

204
